# Supplementary material
Source: PubMed Central journal article supplement (PMC3090248)
Supplement: supp_D012385_jlr.D012385-2.pdf [file supp_D012385_jlr.D012385-2.pdf]

## SUPPLEMENTAL FIGURE 1. Body weights and food intakes of baboons during Part 2

**Baboon # 11878**

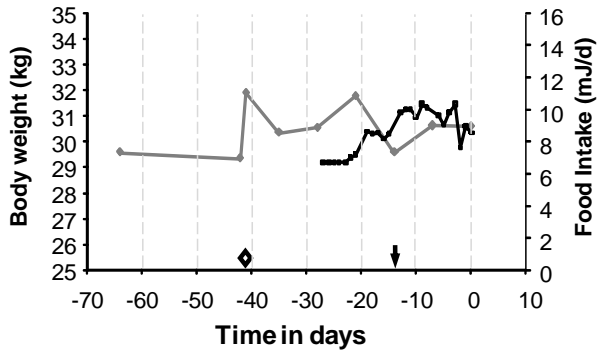

**Baboon # 13546**

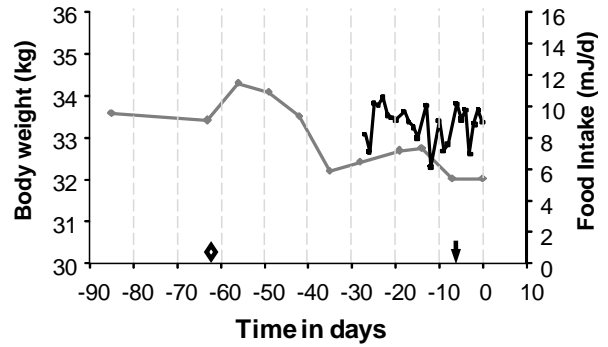

**Baboon # 10659**

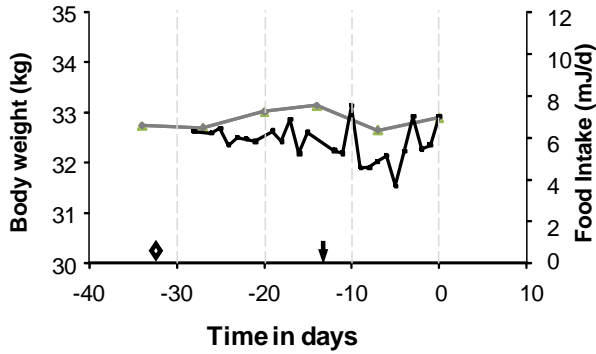

**Baboon # 11077**

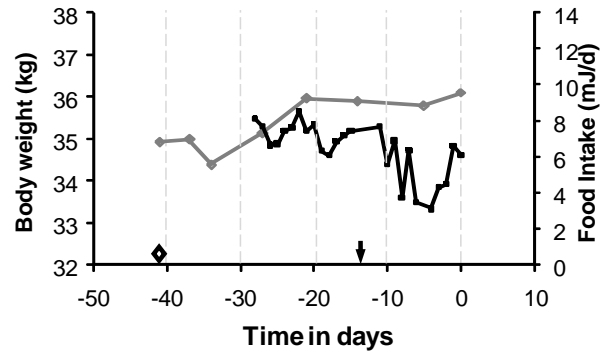

Body weights of 4 animals, studied in Part 2 of this research, were measured weekly from 2 weeks after the sham tether (diamond on x-axis), the surgical catheter placement (arrow on x-axis), and the isotope infusion study (time zero). The food intake was measured daily beginning at least 2-weeks after the sham tether, through catheter placement, up until the infusion study. Food intake was adjusted if the animal lost or gained more than 0.5 kg during a weekly measurement. Note varying time frames on x-axes between animals.
