# Supplementary material
Source: PubMed Central journal article supplement (PMC3090248)
Supplement: supp_D012385_jlr.D012385-3.pdf [file supp_D012385_jlr.D012385-3.pdf]

**SUPPLEMENTAL FIGURE 2. Serum cortisol concentrations during the daylight hours**

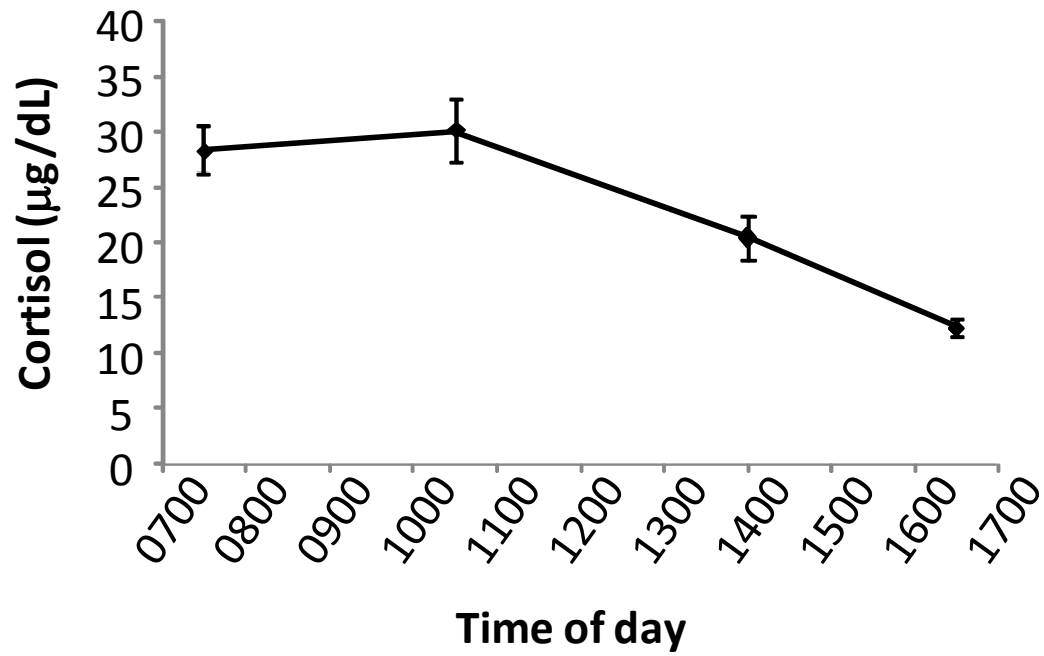

Values are mean  $\pm$  SEM for 7 animals. The light in the room went on at 0600 and off at 1800. Animals were presented with food at 0800; water was given ad lib.
