# Supplementary material
Source: PubMed Central journal article supplement (PMC3090248)
Supplement: supp_D012385_jlr.D012385-4.pdf [file supp_D012385_jlr.D012385-4.pdf]

**SUPPLEMENTARY FIGURE 3. Relationships between RaFFA, body fat and waist circumference**

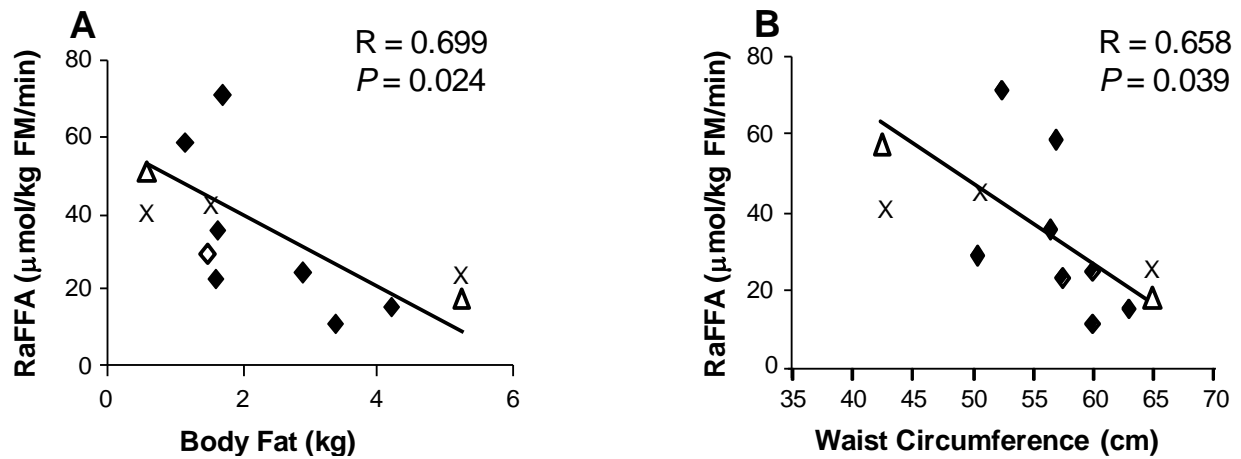

Significant associations between fasting RaFFA and body fat (A) and waist circumference (B). Data from Part 1, are represented by the open diamond for the male animal 11597, who received 0.01 mg/kg/hr of midazolam (his 2<sup>nd</sup> study, see **table 1**); the unfilled triangles represent data from both female animals in Part 1, in which the midazolam was given using 0.04 mg/kg/h (2<sup>nd</sup> study for 11953 and 2<sup>st</sup> study for 11044). This is the same midazolam dose that was used in the subsequent 7 male animals studied in Part 2 (data denoted with filled diamonds). The symbol x presented on the graphs denotes paired data from Part 1, in which each animal underwent 2 studies. These data sit directly in line with their paired data, are added for the reader's interest, and were not used in the correlation.
